# Supplementary material for: Machine learning-driven investigation of the structure and dynamics of the BMIM-BF4 room temperature ionic liquid
Source: Royal Society of Chemistry journal article supplement (doi:10.1039/d4fd00025k), 2024-01-01
Supplement: d4fd00025k1.pdf [file d4fd00025k1.pdf]

# Supplementary Information for Machine Learning-Driven Investigation of the Structure and Dynamics of the BMIM-BF<sub>4</sub> Room Temperature Ionic Liquid

Fabian Zills,<sup>†</sup> Moritz René Schäfer,<sup>‡</sup> Samuel Tovey,<sup>†</sup> Johannes Kästner,<sup>‡</sup> and  
Christian Holm<sup>\*,†</sup>

<sup>†</sup>*Institute for Computational Physics, University of Stuttgart, 70569 Stuttgart, Germany*

<sup>‡</sup>*Institute for Theoretical Chemistry, University of Stuttgart, 70569 Stuttgart, Germany*

E-mail: holm@icp.uni-stuttgart.de

# Radial distribution functions

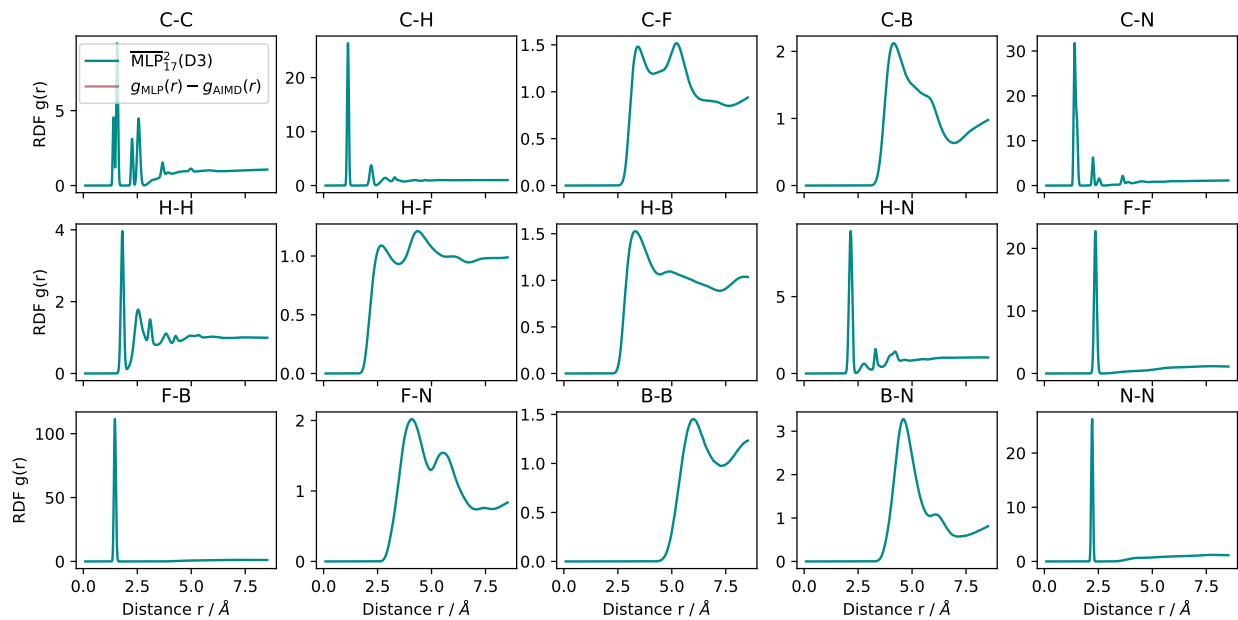

Figure S1: radial distribution function (RDF) for 16 ion pairs at 283 K.

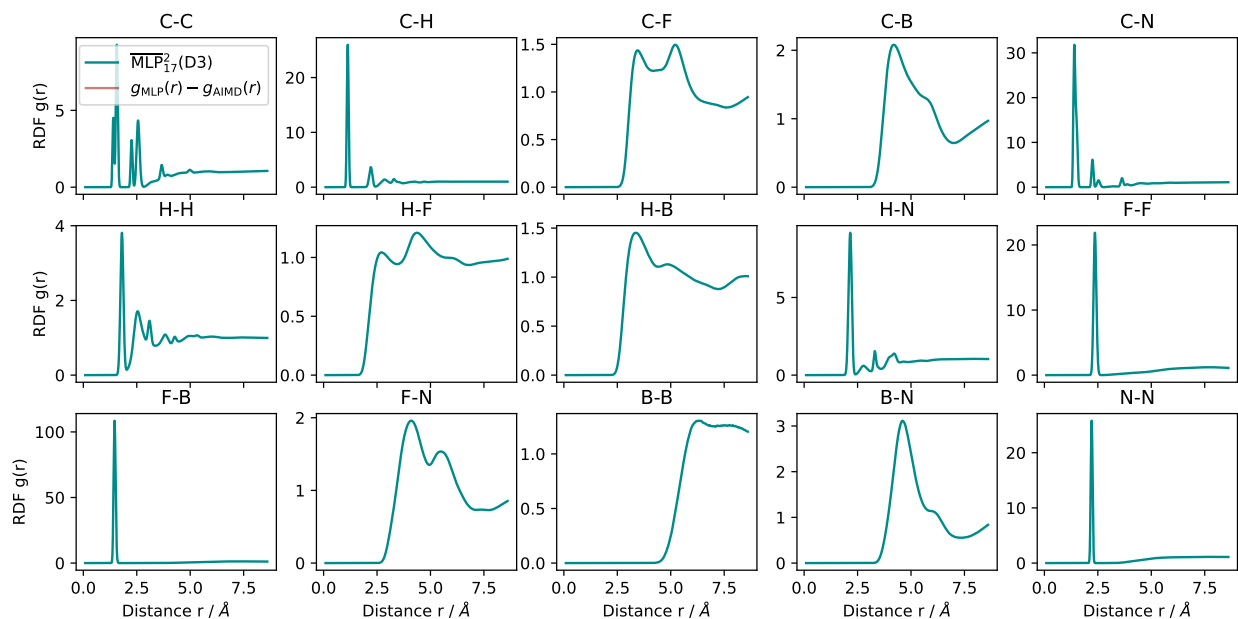

Figure S2: RDF for 16 ion pairs at 293 K.

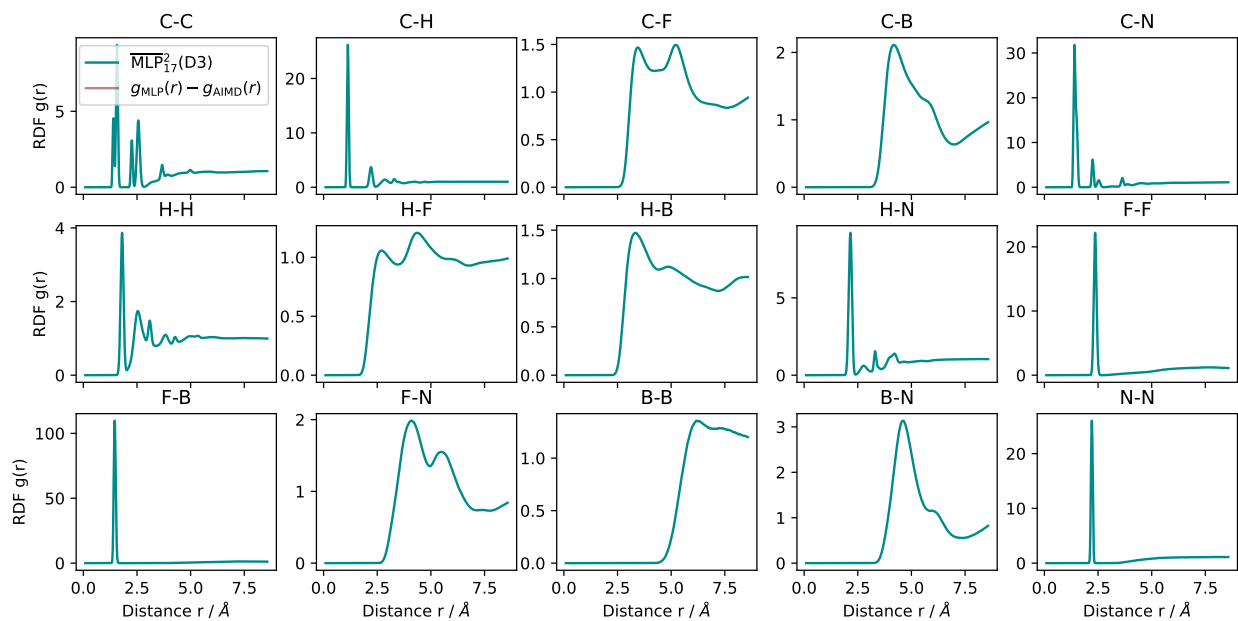

Figure S3: RDF for 16 ion pairs at 313 K.

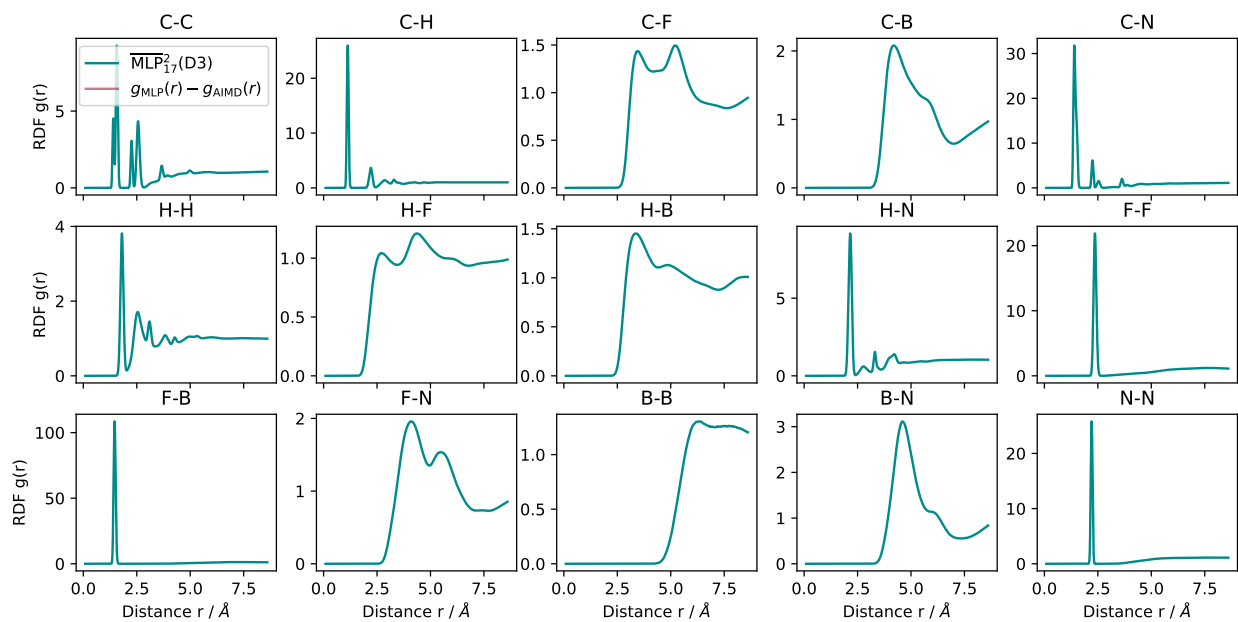

Figure S4: RDF for 16 ion pairs at 333 K.

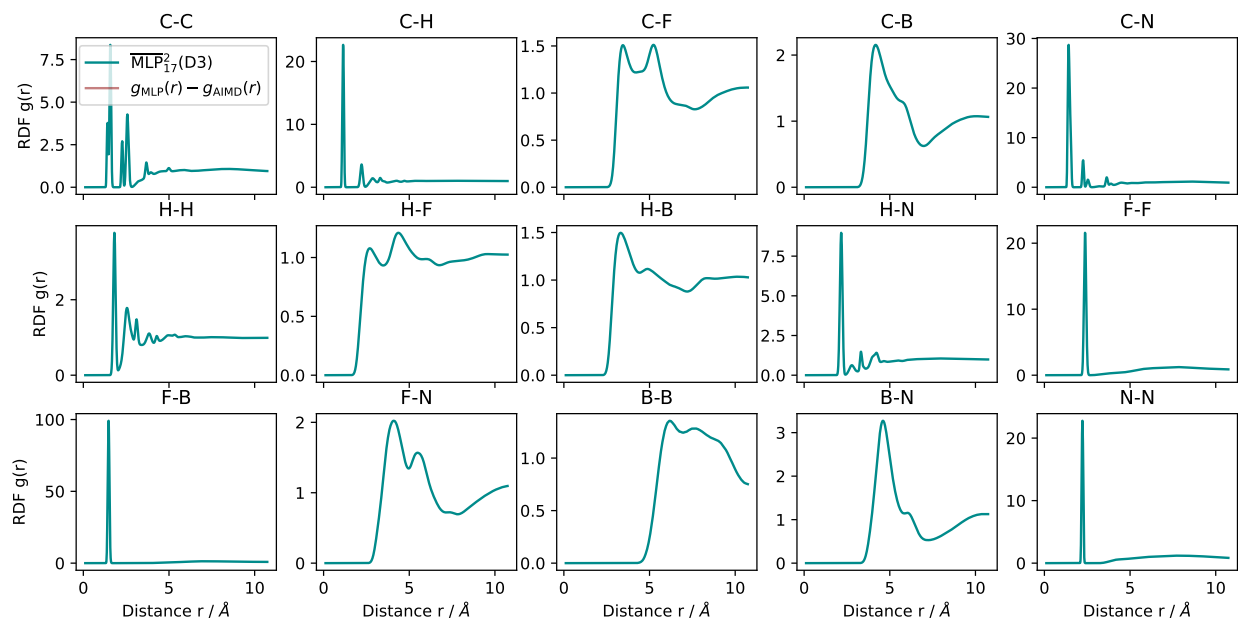

Figure S5: RDF for 32 ion pairs at 283 K.

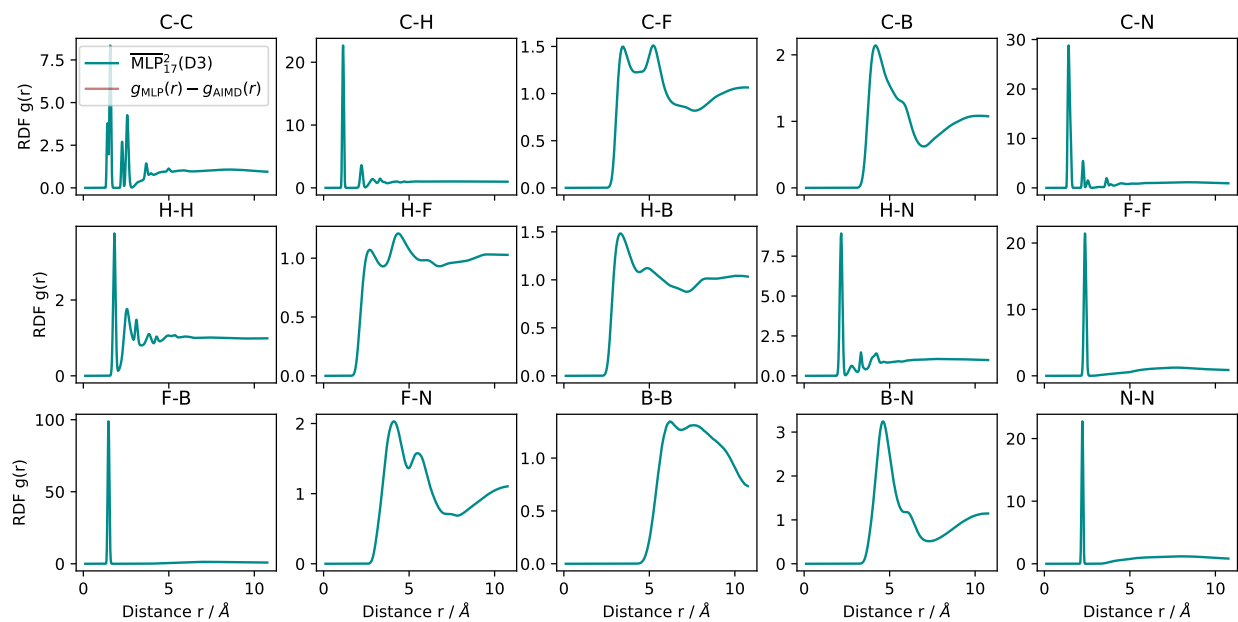

Figure S6: RDF for 32 ion pairs at 293 K.

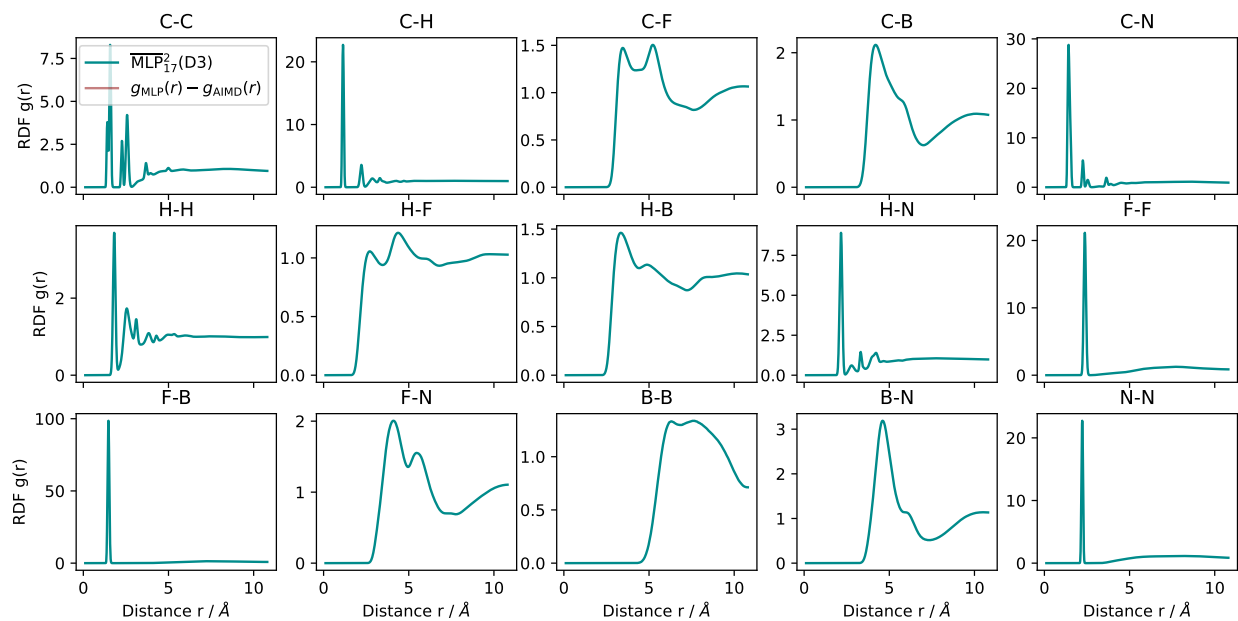

Figure S7: RDF for 32 ion pairs at 313 K.

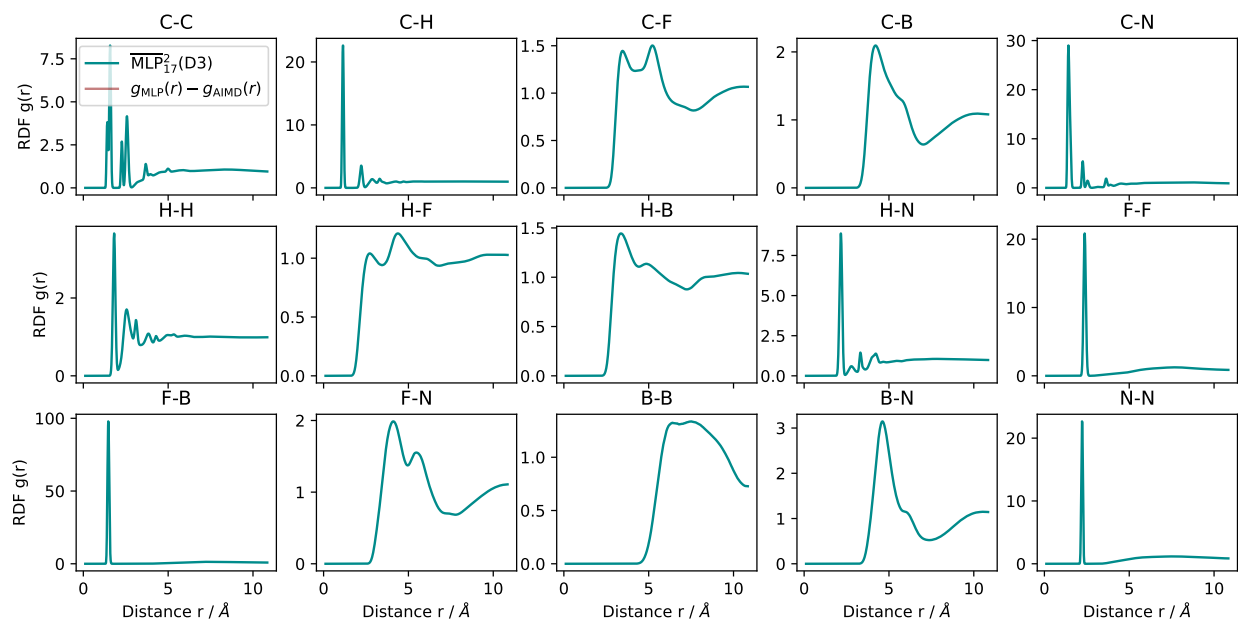

Figure S8: RDF for 32 ion pairs at 333 K.

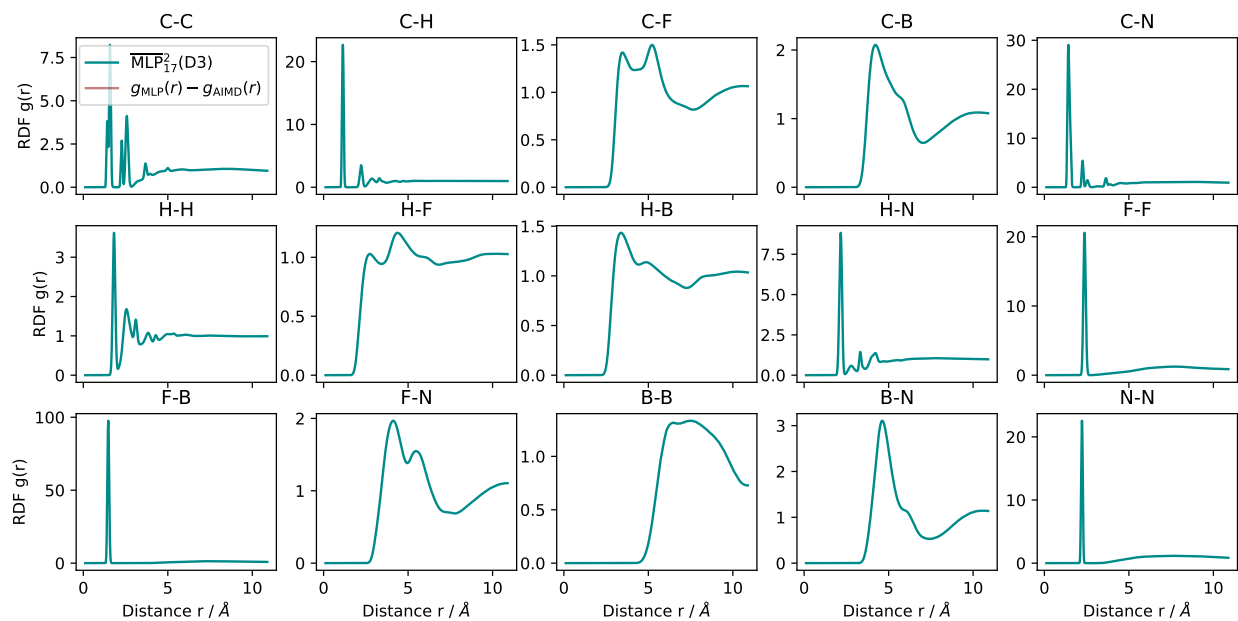

Figure S9: RDF for 32 ion pairs at 353 K.

## Diffusion coefficients

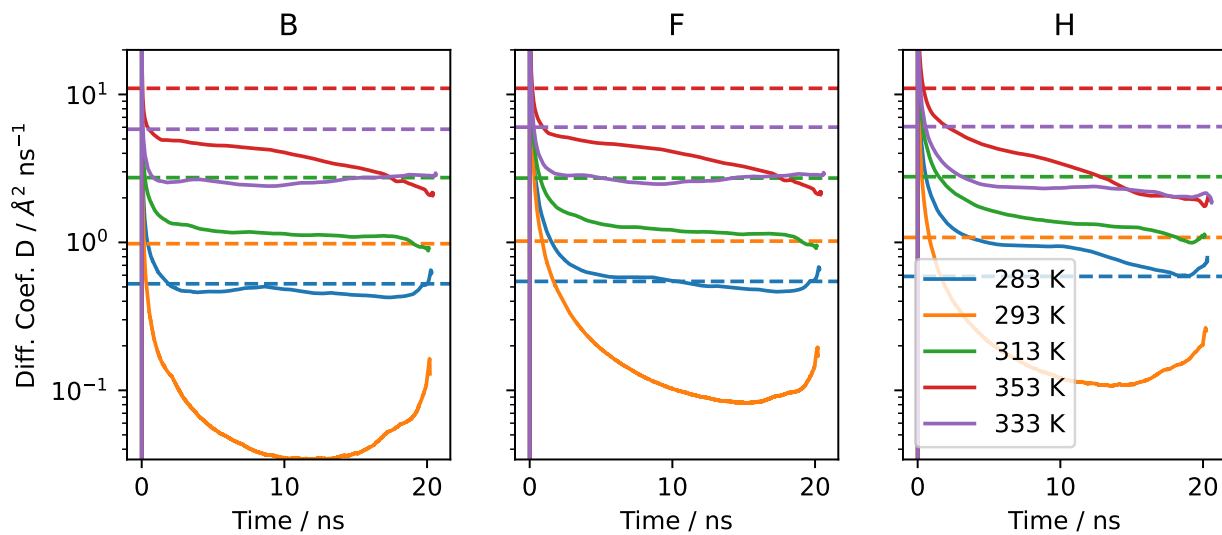

Figure S10: Diffusion coefficients for 8 ion pairs at different temperatures compared to literature.

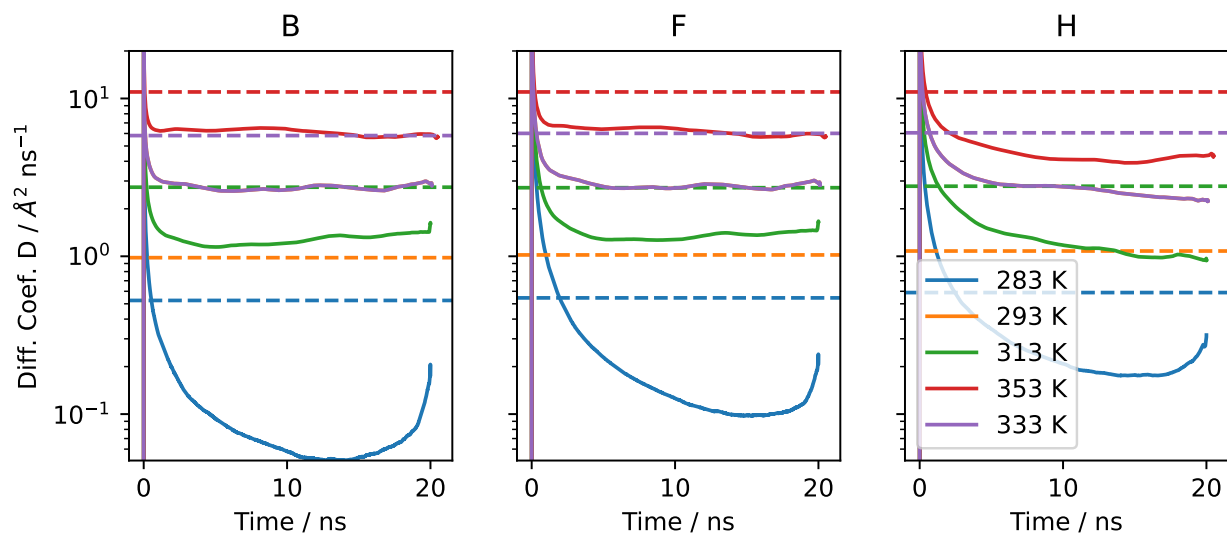

Figure S11: Diffusion coefficients for 16 ion pairs at different temperatures compared to literature.

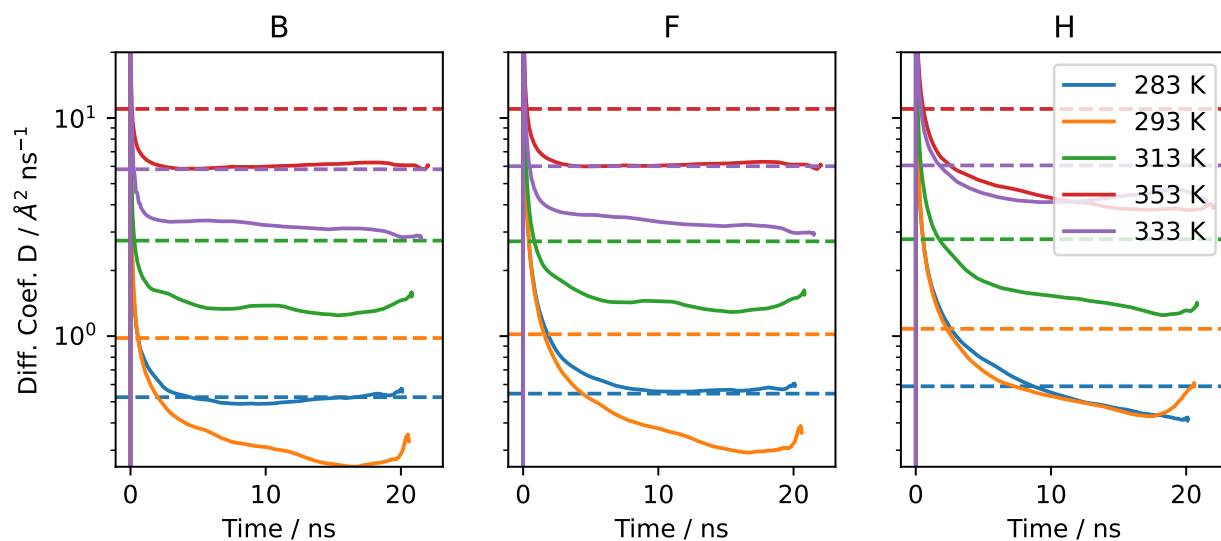

Figure S12: Diffusion coefficients for 32 ion pairs at different temperatures compared to literature.

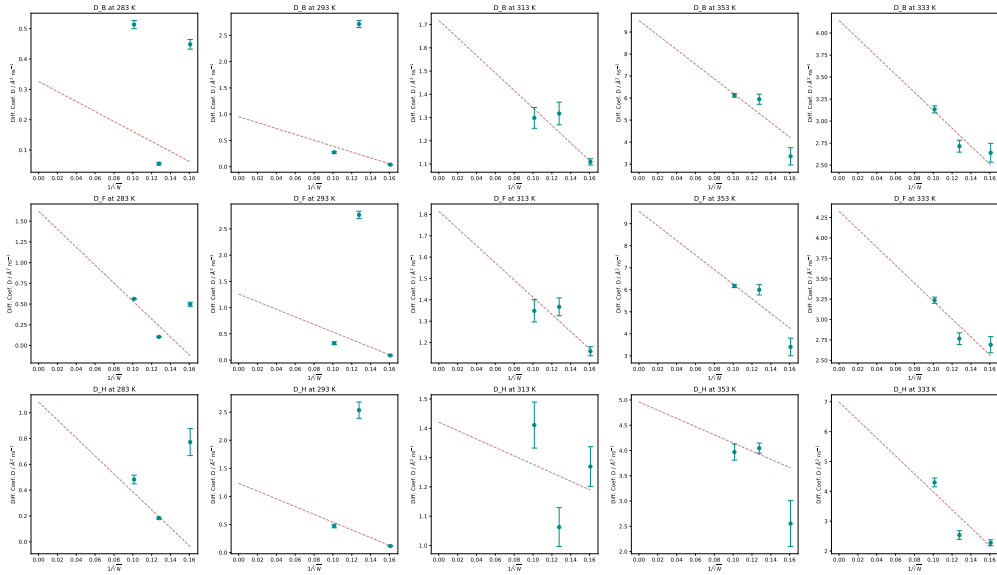

Figure S13: Finite size scaling of the diffusion coefficients.

## Density

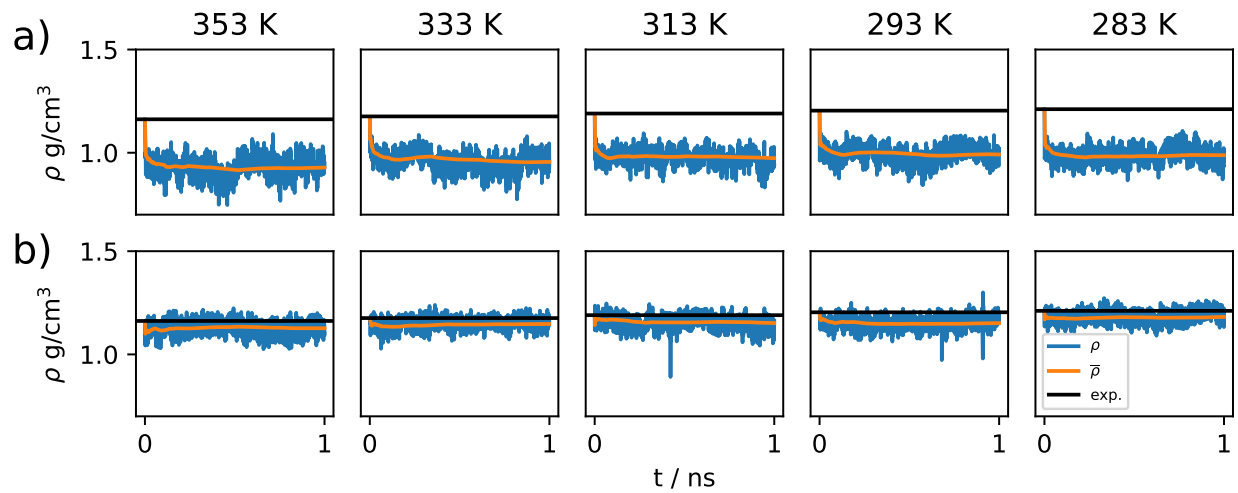

Figure S14: Density over time for a)  $\overline{\text{MLP}}_{17}^2(\text{D3}(8 \text{ \AA}))$  and b)  $\overline{\text{MLP}}_{17}^2+\text{D3}(20 \text{ \AA})$



# AIMD

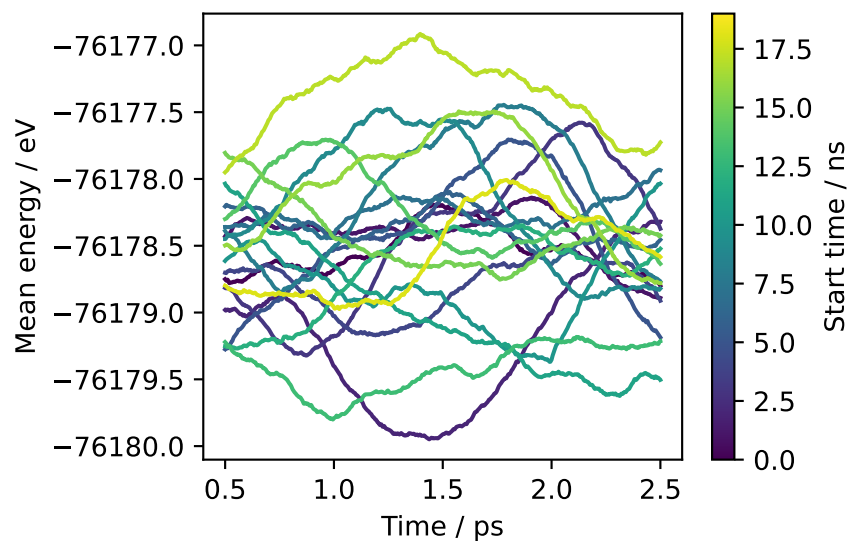

Figure S15: Energies of the  $20 \times 2.5$  ps *ab initio* molecular dynamics (AIMD) simulation at 353 K for 16 ion pairs. A running average over 0.5 ps is applied.
